# Supplementary material for: Casein kinase 1 controls the activation threshold of an α-arrestin by multisite phosphorylation of the interdomain hinge
Source: PubMed Central journal article supplement — Mol Biol Cell. 2015 Jun 1;26(11):2128–38. doi: 10.1091/mbc.E14-11-1552 (PMC4472021; doi:10.1091/mbc.e14-11-1552), 2015-06-01
Supplement: supp_E14-11-1552v1_CombinedSupMats.pdf [file supp_E14-11-1552v1_CombinedSupMats.pdf]

# Supplemental Materials

*Molecular Biology of the Cell*

Herrador et al.
